# Supplementary material for: Detection of ammonia on Pluto’s surface in a region of geologically recent tectonism
Source: PubMed Central journal article supplement — Sci Adv. 2019 May 29;5(5):eaav5731. doi: 10.1126/sciadv.aav5731 (PMC6771079; doi:10.1126/sciadv.aav5731), 2019-05-29
Supplement: aav5731_SM.pdf [file aav5731_SM.pdf]

[advances.sciencemag.org/cgi/content/full/5/5/eaav5731/DC1](https://advances.sciencemag.org/cgi/content/full/5/5/eaav5731/DC1)

## Supplementary Materials for

### **Detection of ammonia on Pluto's surface in a region of geologically recent tectonism**

C. M. Dalle Ore\*, D. P. Cruikshank\*, S. Protopapa, F. Scipioni, W. B. McKinnon, J. C. Cook, W. M. Grundy, B. Schmitt, S. A. Stern, J. M. Moore, A. Verbiscer, A. H. Parker, K. N. Singer, O. M. Umurhan, H. A. Weaver, C. B. Olkin, L. A. Young, K. Ennico, New Horizons Surface Composition Science Theme Team

\*Corresponding author. Email: [cristina.m.dalleore@nasa.gov](mailto:cristina.m.dalleore@nasa.gov) (C.M.D.O.); [dale.p.cruikshank@nasa.gov](mailto:dale.p.cruikshank@nasa.gov) (D.P.C.)

Published 29 May 2019, *Sci. Adv.* **5**, eaav5731 (2019)

DOI: 10.1126/sciadv.aav5731

#### **Other Supplementary Material for this manuscript includes the following:**

(available at [advances.sciencemag.org/cgi/content/full/5/5/eaav5731/DC1](https://advances.sciencemag.org/cgi/content/full/5/5/eaav5731/DC1))

List of members of the New Horizons Surface Composition Science Theme Team (Microsoft Excel format).
